# Supplementary material
Source: PubMed Central journal article supplement (PMC7856581)
Supplement: sj-pdf-1-eso-10.1177_2396987320957513.pdf [file sj-pdf-1-eso-10.1177_2396987320957513.pdf]

**Supplemental table 1. Achieved blood pressure by sex and randomized treatment**

a)

| Sex    | Achieved blood pressure within 1 hour, mean(SD) |             | P value* | P homogeneity* |
|--------|-------------------------------------------------|-------------|----------|----------------|
|        | Intensive                                       | Guideline   |          |                |
| Female | 157.1(18.3)                                     | 167.2(19.2) | <0.0001  | 0.176          |
| Male   | 158.7(18.9)                                     | 167.5(20.5) | <0.0001  |                |

b)

| Sex    | Achieved blood pressure at day 1, mean(SD) |             | P value* | P homogeneity* |
|--------|--------------------------------------------|-------------|----------|----------------|
|        | Intensive                                  | Guideline   |          |                |
| Female | 141.1(13.4)                                | 154.6(14.8) | <0.0001  | 0.607          |
| Male   | 143.4(13.8)                                | 155.8(15.5) | <0.0001  |                |

f)

| Sex    | Achieved blood pressure from day 2 to day 7, mean(SD) |             | P value* | P homogeneity* |
|--------|-------------------------------------------------------|-------------|----------|----------------|
|        | Intensive                                             | Guideline   |          |                |
| Female | 139.1(11.2)                                           | 140.9(12.3) | <0.0001  | 0.667          |
| Male   | 147.7(13.7)                                           | 149.4(14.6) | <0.0001  |                |

\* adjusted by age, region of recruitment (China vs non-China), history of ischemic stroke or other undifferentiated stroke, admission glucose (>6.5 vs ≤6.5), history of antihypertensive therapy, admission SBP, admission NIHSS score (<15 vs ≥15), admission hematoma volume

**Supplemental table 2. The effect of sex and randomised treatment to clinical outcome at 3 months**

| b)     |                           |                |                 |         |                 |          |                   |
|--------|---------------------------|----------------|-----------------|---------|-----------------|----------|-------------------|
|        | Death                     |                | OR (95% CI)     | P value | OR* (95% CI)    | P value* | P homogeneity*    |
|        | Intensive                 | Guideline      |                 |         |                 |          |                   |
| Female | 61/580(10.5)              | 65/607(10.7)   | 0.98(0.68-1.42) | 0.915   | 0.88(0.56-1.38) | 0.580    | 0.540             |
| Male   | 126/1016(12.4)            | 130/1014(12.8) | 0.96(0.74-1.25) | 0.776   | 1.06(0.77-1.46) | 0.706    |                   |
| c)     |                           |                |                 |         |                 |          |                   |
|        | Major disability          |                | OR (95% CI)     | P value | OR* (95% CI)    | P value* | P homogeneity*    |
|        | Intensive                 | Guideline      |                 |         |                 |          |                   |
| Female | 247/515(48.0)             | 273/538(50.7)  | 0.90(0.70-1.14) | 0.367   | 0.89(0.66-1.19) | 0.418    | 0.707             |
| Male   | 380/879(43.2)             | 412/873(47.2)  | 0.85(0.71-1.03) | 0.096   | 0.95(0.76-1.20) | 0.666    |                   |
| d)     |                           |                |                 |         |                 |          |                   |
|        | Death or major disability |                | OR (95% CI)     | P value | OR* (95% CI)    | P value* | P homogeneity*    |
|        | Intensive                 | Guideline      |                 |         |                 |          |                   |
| Female | 308/576(53.5)             | 338/603(56.1)  | 0.90(0.72-1.13) | 0.374   | 0.88(0.66-1.16) | 0.363    | 0.718             |
| Male   | 506/1005(50.4)            | 542/1003(54.0) | 0.86(0.72-1.03) | 0.098   | 0.94(0.75-1.17) | 0.563    |                   |
| e)     |                           |                |                 |         |                 |          |                   |
|        | Shift on mRS              |                | OR (95% CI)     | P value | OR* (95% CI)    | P value* | Adjusted P value* |
|        | Intensive                 | Guideline      |                 |         |                 |          |                   |
| Female | N/A                       | N/A            | 1.12(0.92-1.37) | 0.262   | 1.17(0.94-1.45) | 0.166    | 0.305             |
| Male   | N/A                       | N/A            | 1.14(0.98-1.33) | 0.089   | 1.00(0.84-1.18) | 0.990    |                   |

\* adjusted by age, region of recruitment (China vs non-China), history of ischemic stroke or other undifferentiated stroke, admission glucose (>6.5 vs ≤6.5), history of antihypertensive therapy, admission SBP, admission NIHSS score (<15 vs ≥15), admission hematoma volume,

**Supplemental table 3. Hematoma growth at 24 hours by sex and randomised treatment**

|        | Hematoma growth at 24 hours |           | Adjusted P value* | P interaction* |
|--------|-----------------------------|-----------|-------------------|----------------|
|        | Intensive                   | Guideline |                   |                |
| Female | 2.2(8.6)                    | 2.7(13.2) | 0.446             | 0.433          |
| Male   | 3.1(12.7)                   | 5.0(19.9) | 0.072             |                |

\*adjusted for age, region of recruitment (China vs non-China), history of ischemic stroke, admission glucose (>6.5 vs ≤6.5), history of antihypertensive therapy, admission NIHSS score(<15 vs ≥15), admission hematoma volume, randomized BP lowering treatment

**Supplemental table 4. Perihematomal edema at 24 hours by sex and randomized treatment**

|        | Edema growth at 24 hours, mean(SD) |           | P value* | Adjusted P value* |
|--------|------------------------------------|-----------|----------|-------------------|
|        | Intensive                          | Guideline |          |                   |
| Female | 3.5(6.0)                           | 4.1(9.2)  | 0.241    | 0.682             |
| Male   | 3.5(6.0)                           | 4.4(9.7)  | 0.070    |                   |

\*adjusted for age, region of recruitment (China vs non-China), history of ischemic stroke, admission glucose (>6.5 vs ≤6.5), history of antihypertensive therapy, admission NIHSS score(<15 vs ≥15), admission hematoma volume, randomized BP lowering treatment
